# Supplementary material
Source: HighWire-hosted journal article supplement (https://jitc.bmj.com/content/10/7/e004464)

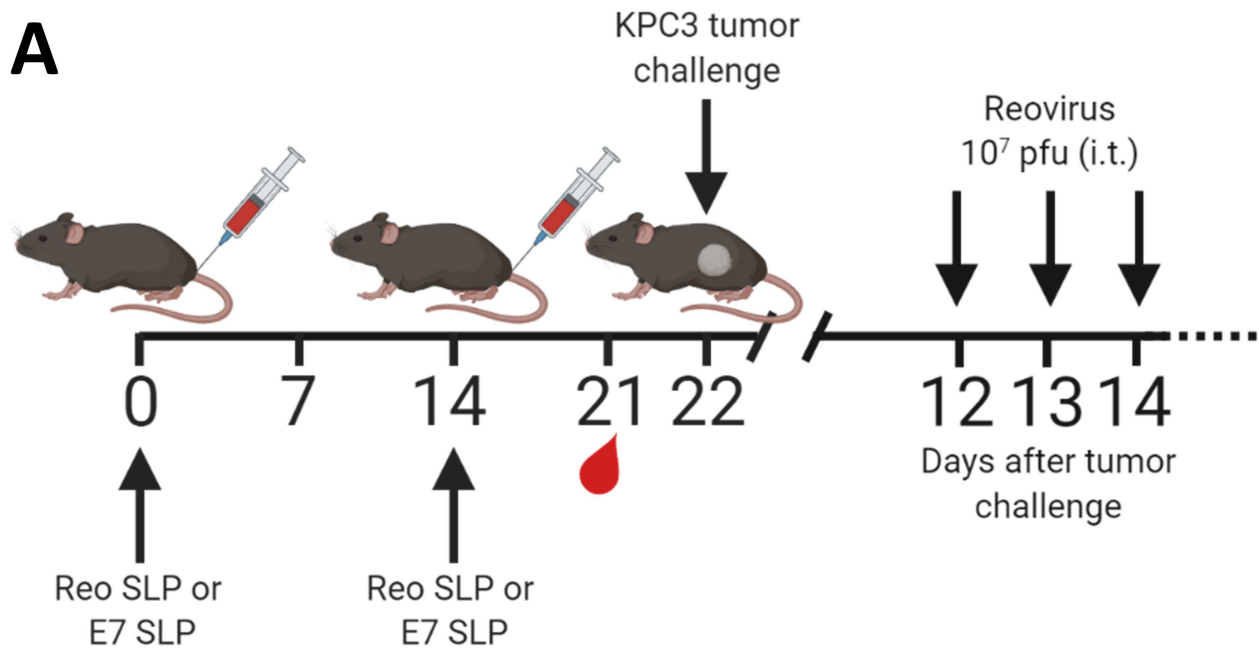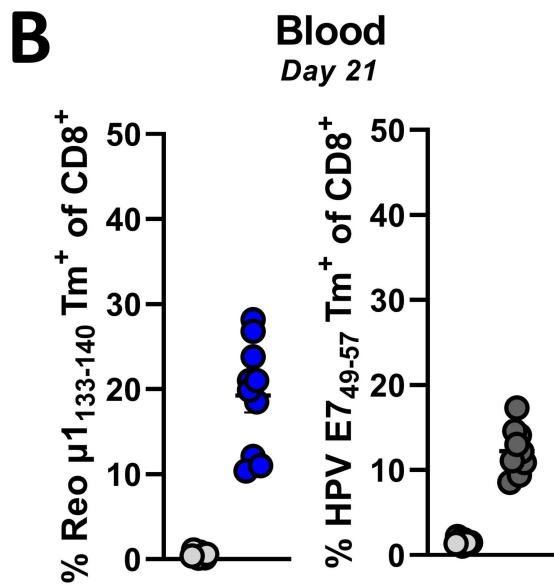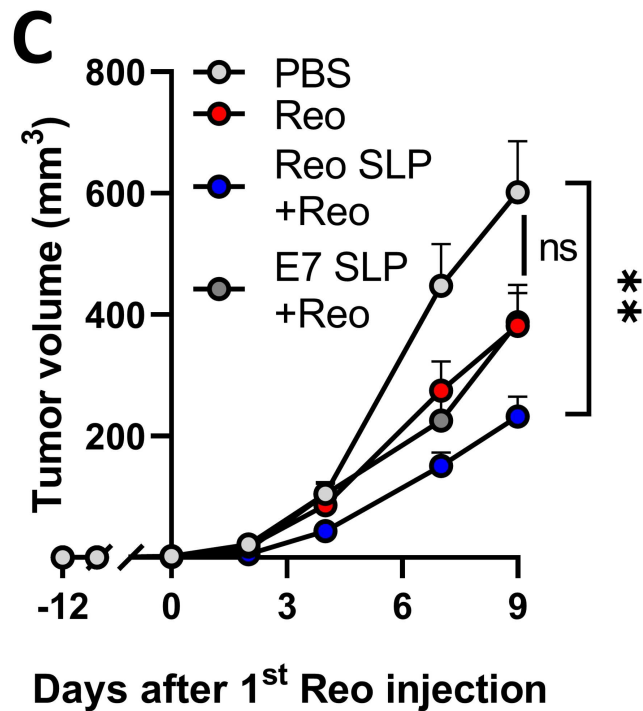

Supplement: inline-supplementary-material-11 [file inline-supplementary-material-11.pdf]

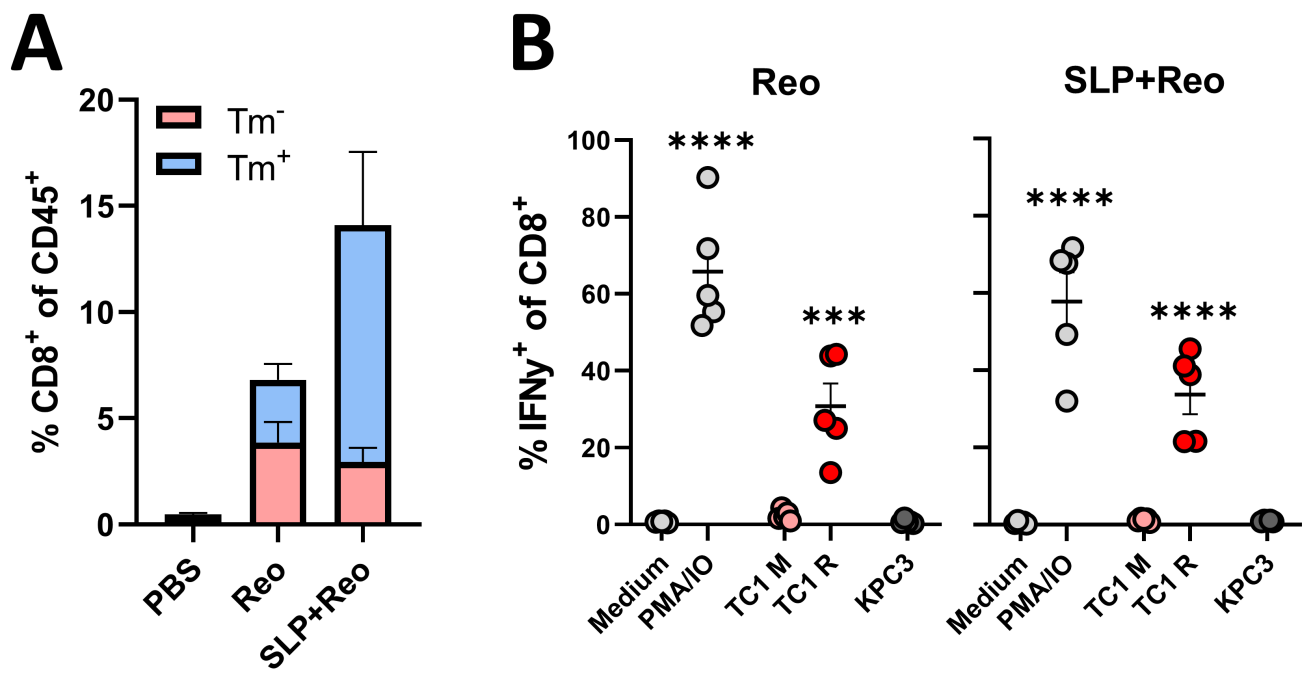

Supplement: inline-supplementary-material-12 [file inline-supplementary-material-12.pdf]

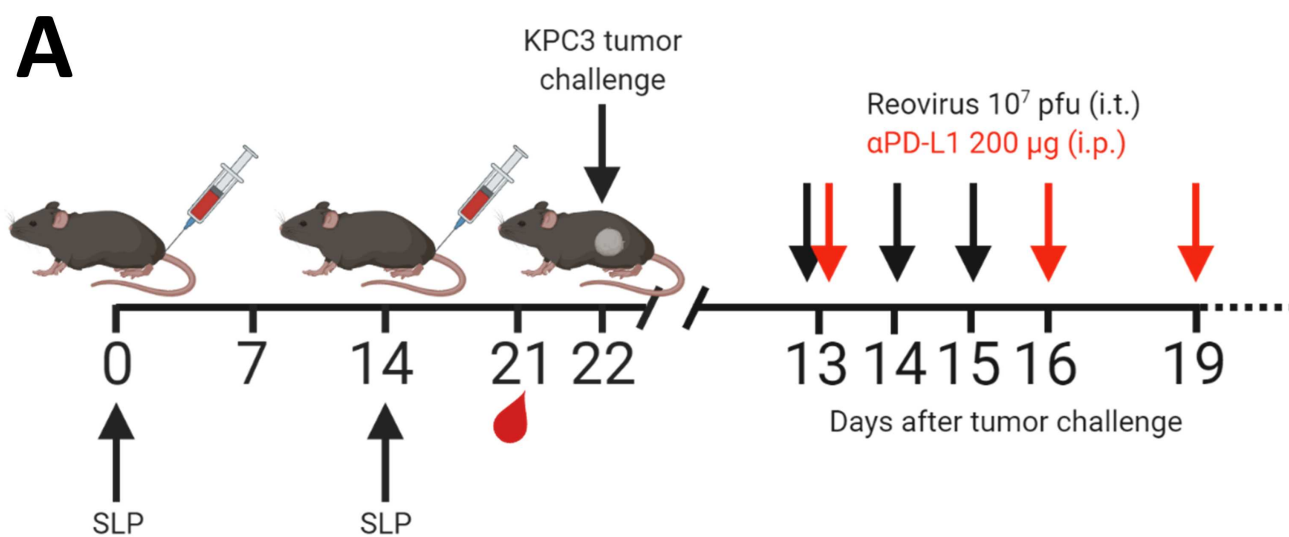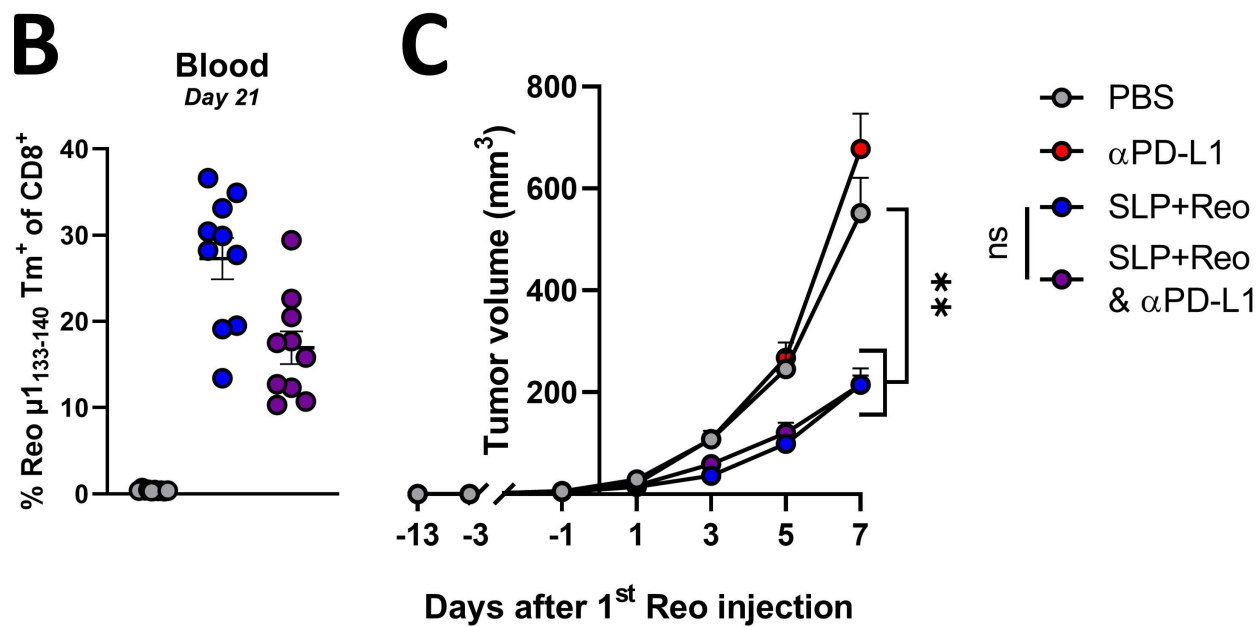

Supplement: inline-supplementary-material-13 [file inline-supplementary-material-13.pdf]

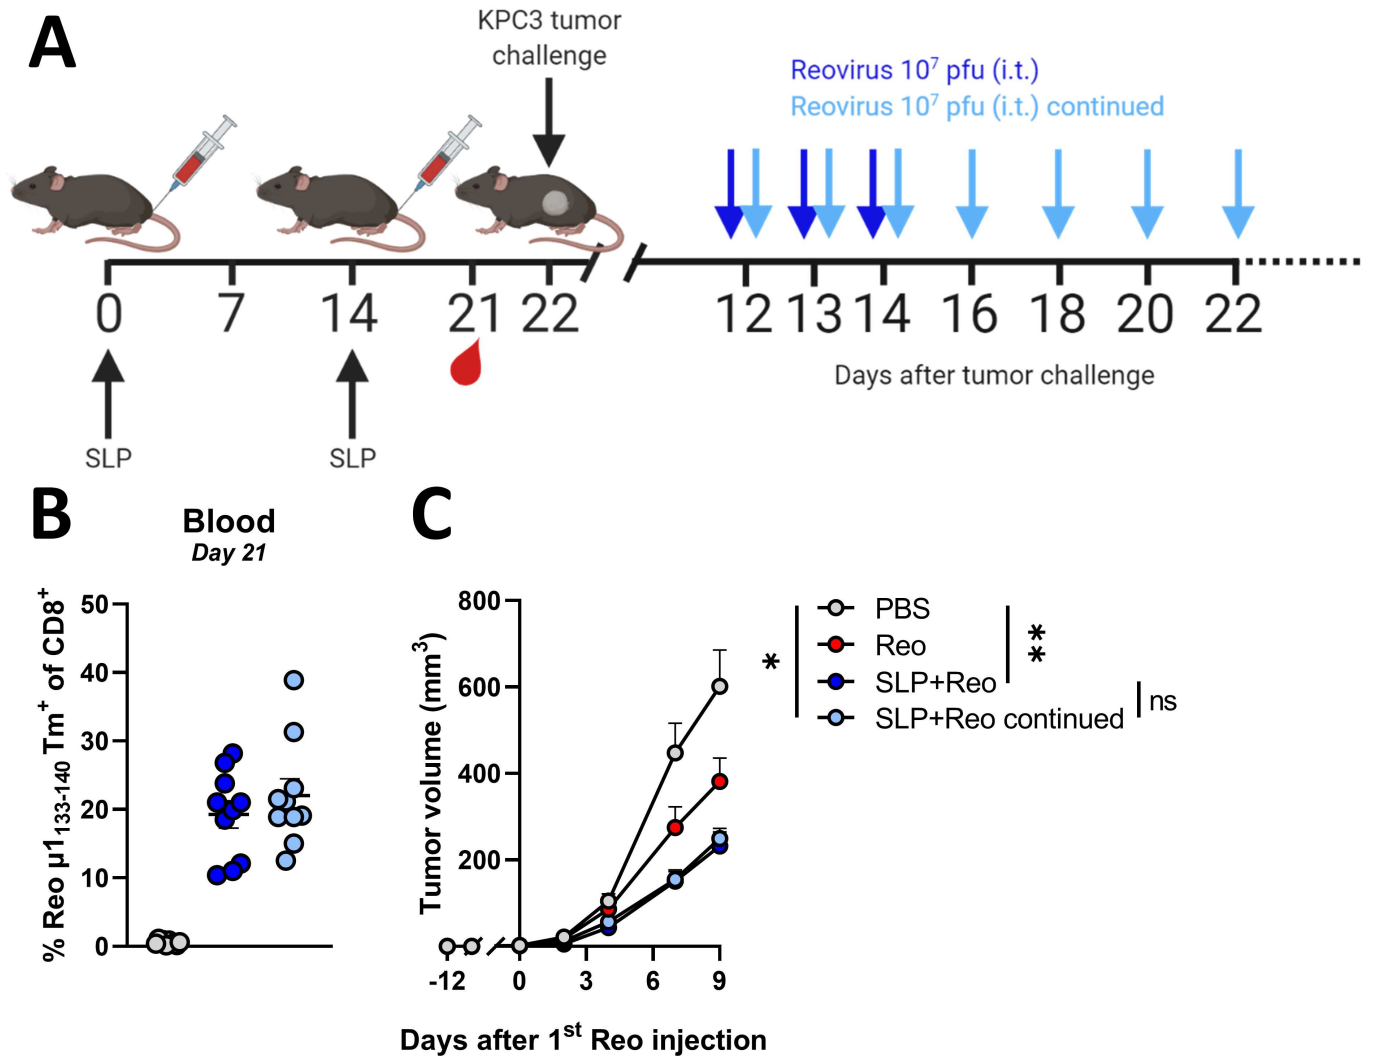

Supplement: inline-supplementary-material-14 [file inline-supplementary-material-14.pdf]

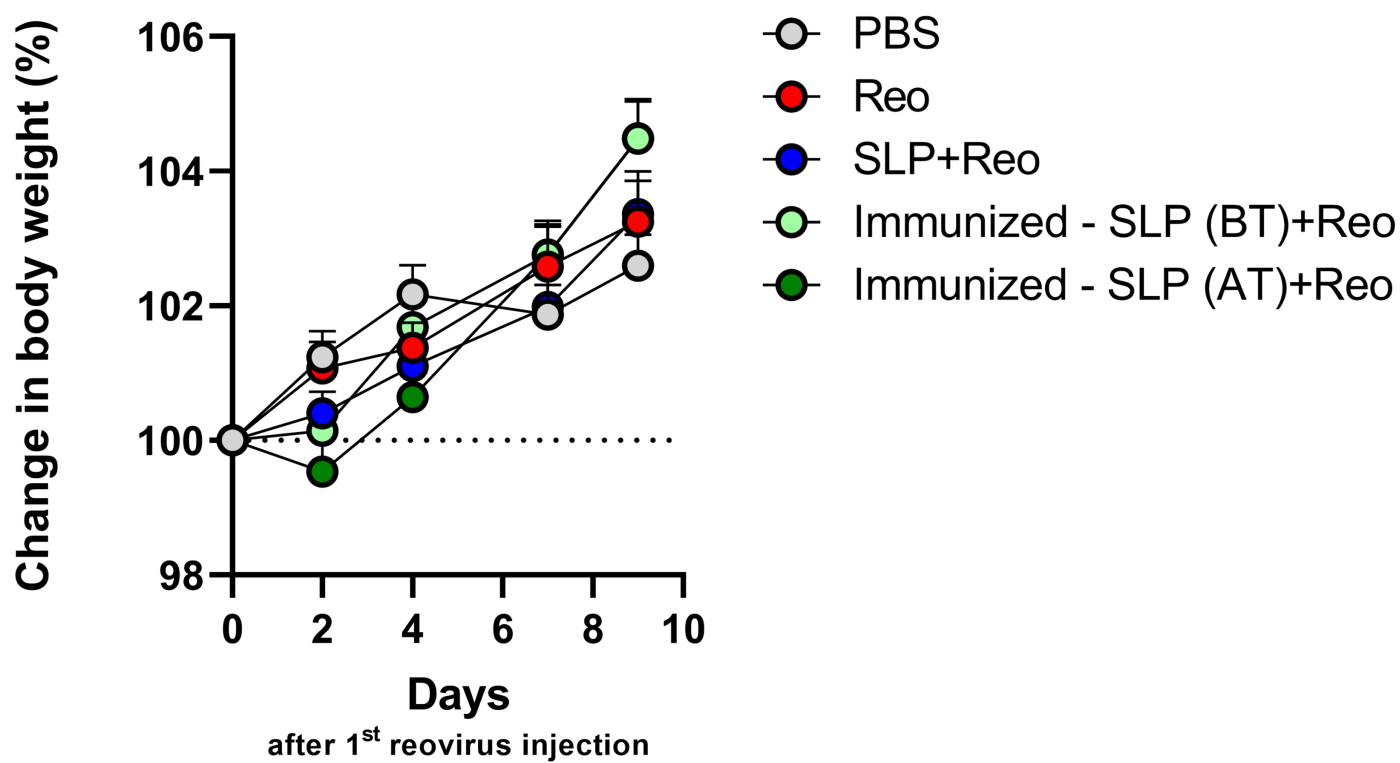

Supplement: inline-supplementary-material-15 [file inline-supplementary-material-15.pdf]

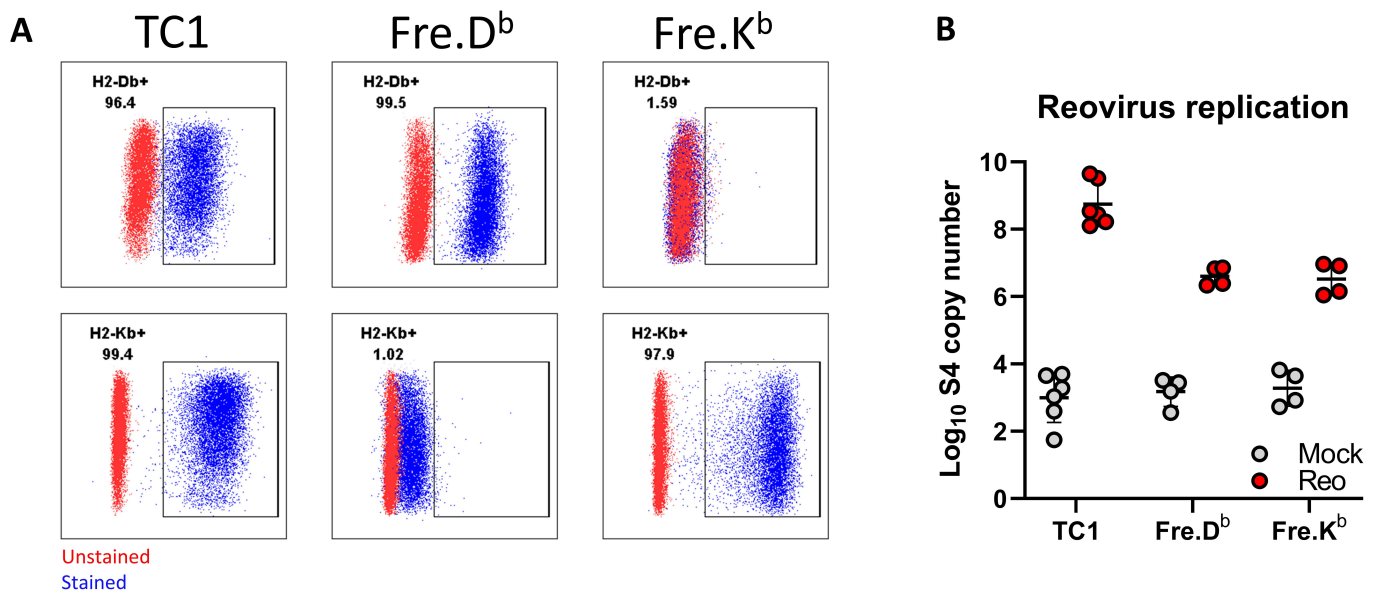

Supplement: inline-supplementary-material-3 [file inline-supplementary-material-3.pdf]

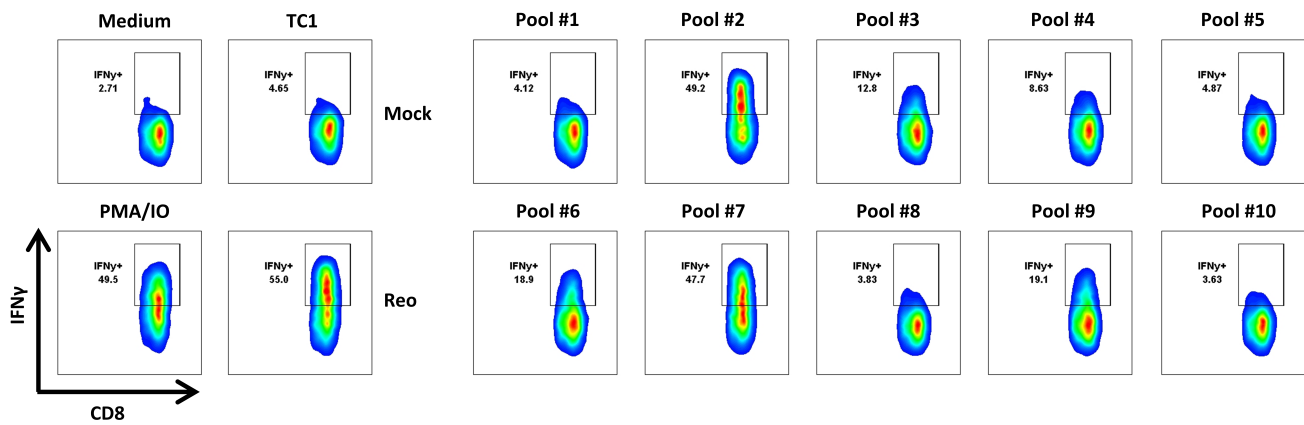

Supplement: inline-supplementary-material-4 [file inline-supplementary-material-4.pdf]

### TC1 Day 7

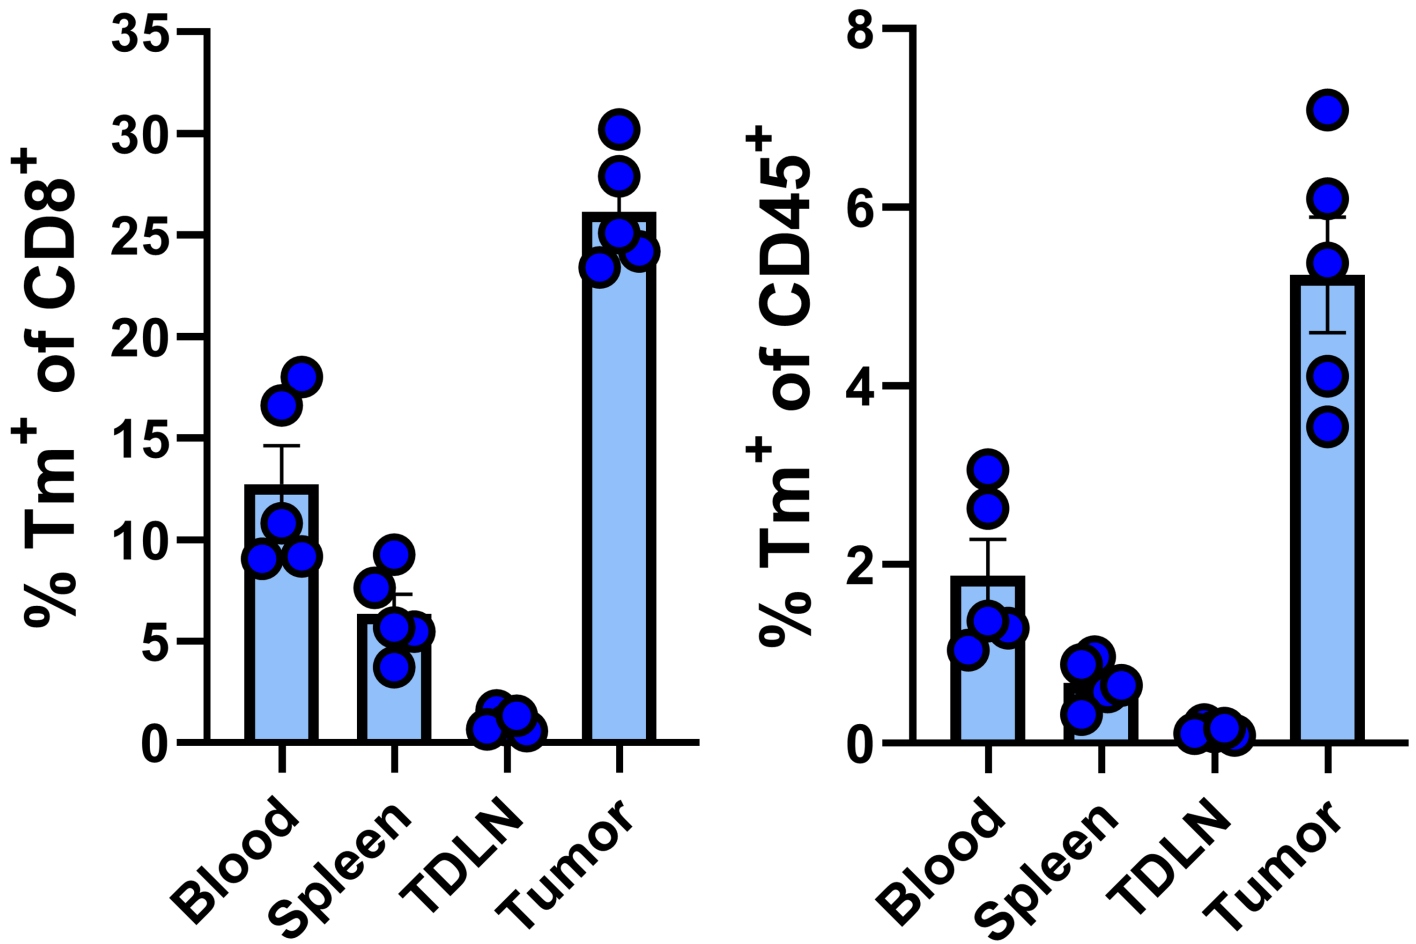

Supplement: inline-supplementary-material-5 [file inline-supplementary-material-5.pdf]

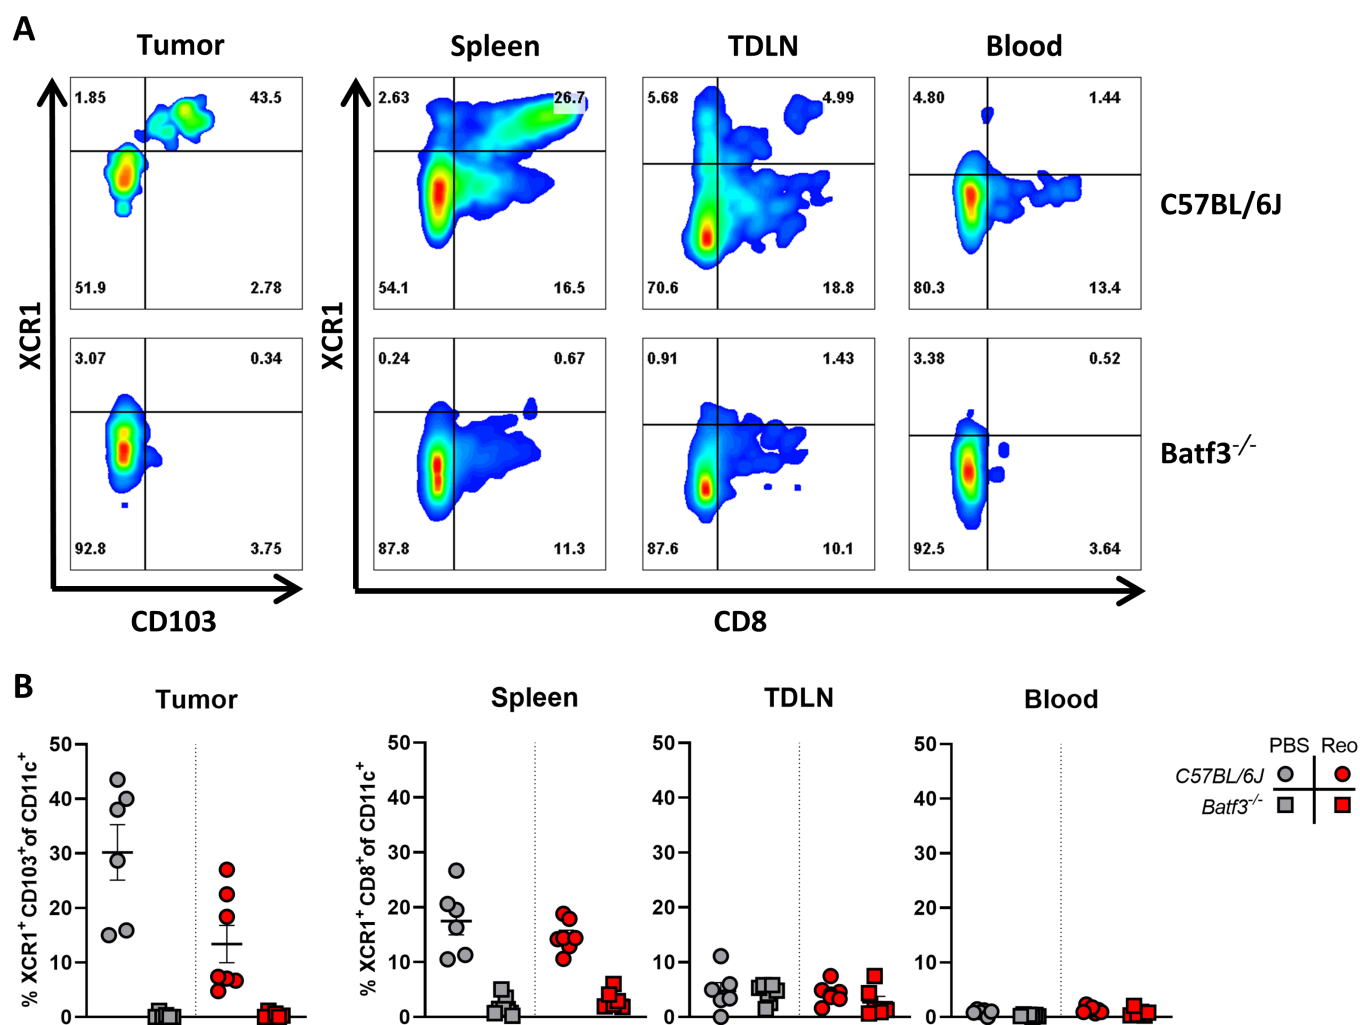

Supplement: inline-supplementary-material-7 [file inline-supplementary-material-7.pdf]

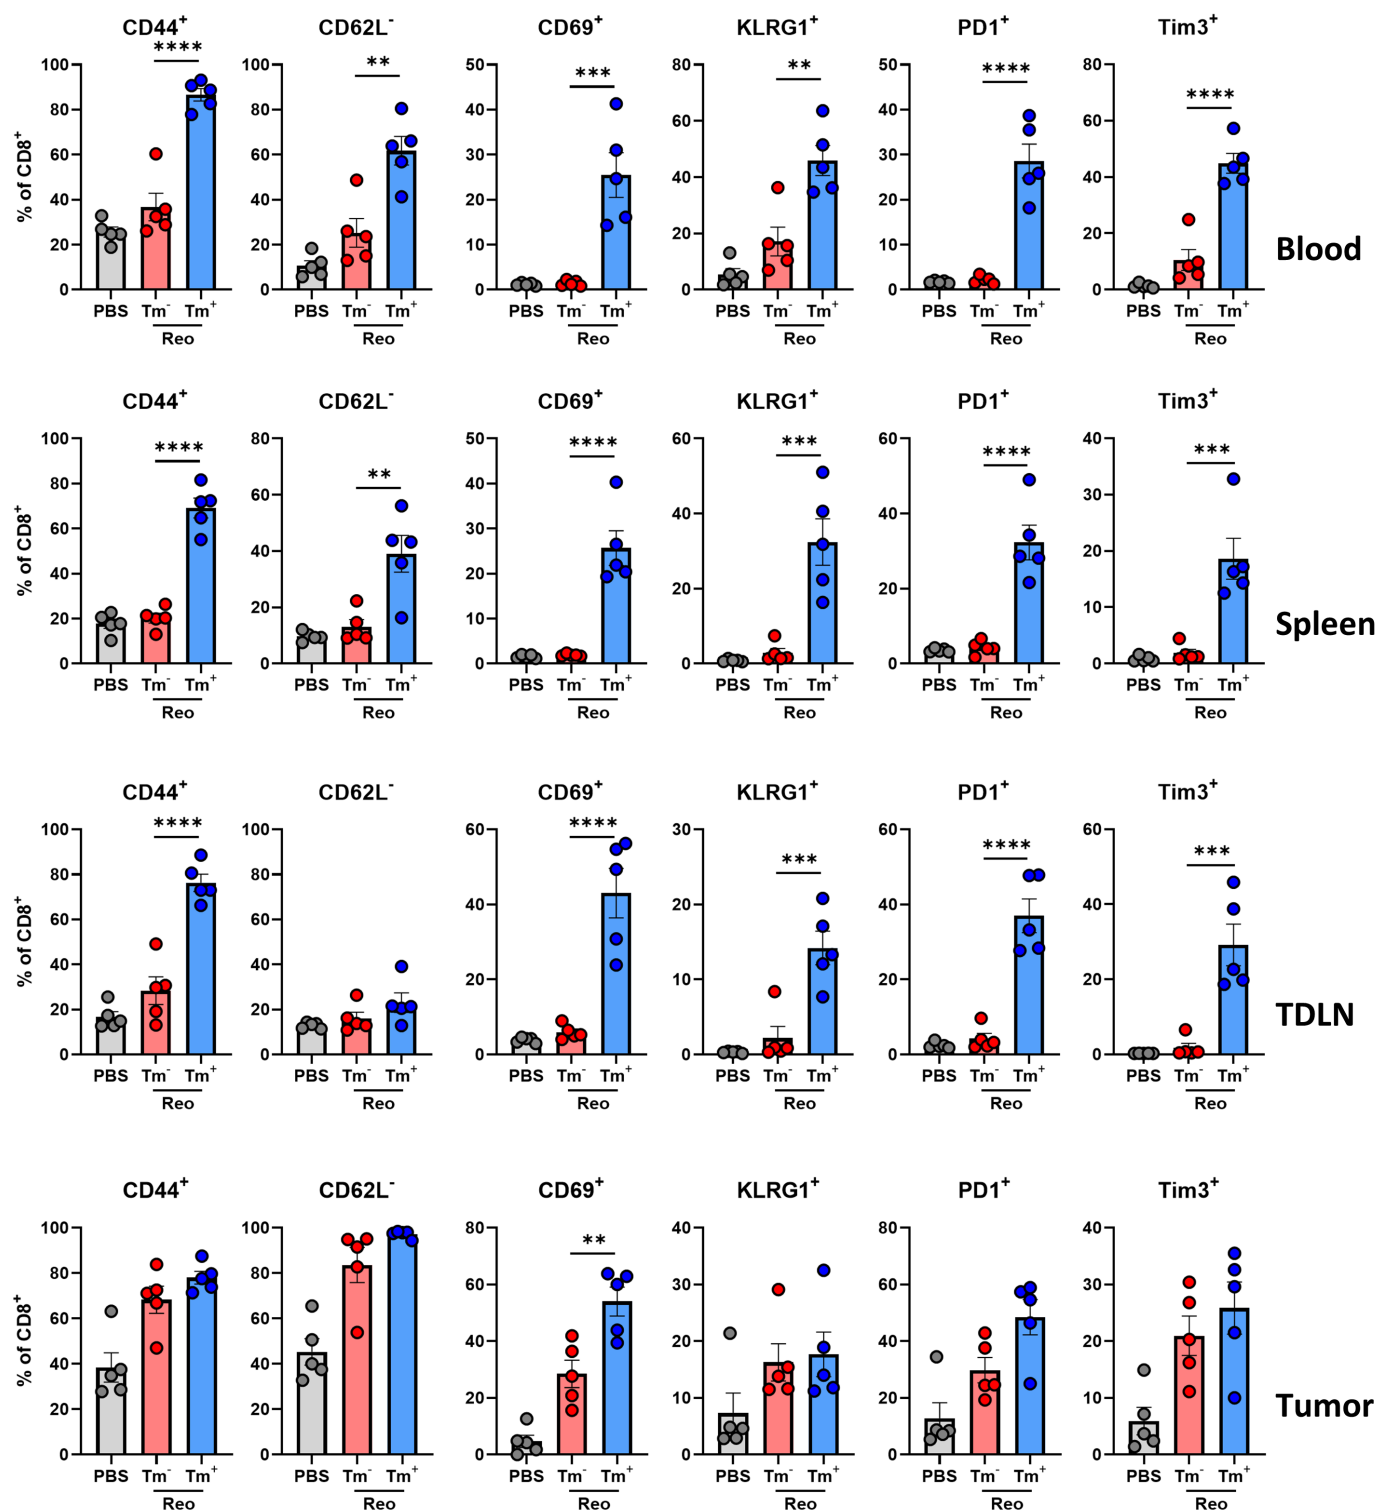

Supplement: inline-supplementary-material-8 [file inline-supplementary-material-8.pdf]

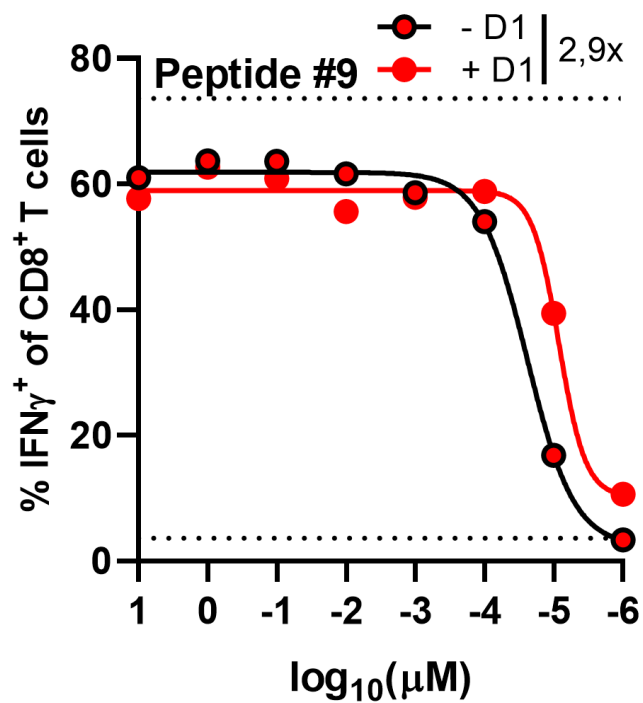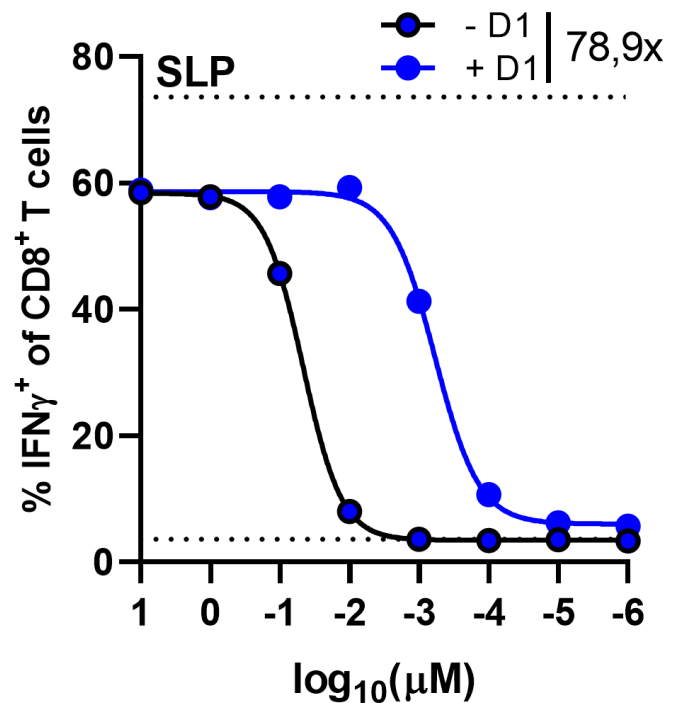

Supplement: inline-supplementary-material-9 [file inline-supplementary-material-9.pdf]
